# Supplementary material for: Chain collapse and dynamics of inhomogeneities in aqueous solutions of poly( N -isopropylacrylamide) and its block copolymers with polyethylene glycol
Source: Royal Society of Chemistry journal article supplement (doi:10.1039/d5cp04279h), 2026-01-01
Supplement: d5cp04279h1.pdf [file d5cp04279h1.pdf]

## Supplementary information to the article “Chain collapse and dynamics of inhomogeneities in aqueous solutions of poly(N-isopropylacrylamide) and its block copolymers with polyethylene glycol”

Georgii A. Simenido <sup>\*a</sup>, Timofei D. Shatrov <sup>a</sup>, Elena V. Chernikova <sup>a</sup> and Elena N. Golubeva <sup>a</sup>

<sup>a</sup>M.V. Lomonosov Moscow State University, Chemistry Department, Leninskiye Gory, 1/3, Moscow, Russian Federation

\* Corresponding Author (simenido1@gmail.com)

### EPR spectra processing and simulation

The amplitudes and linewidths of the spectral lines were measured using the ESRD program (Chemistry Faculty of Lomonosov Moscow State University).<sup>1</sup> All spectra simulations were performed using homemade scripts for the EasySpin (v. 6.0.2) open-source MATLAB toolkit.<sup>2,3</sup> Simulation quality was determined by calculation of the root mean square deviation (RMSD) value between simulated and experimental spectra. The following values were taken as the initial values of diagonalized **g**- and **A**-tensors:  $g_x = 2.0092$ ,  $g_y = 2.0062$ ,  $g_z = 2.0022$ ;  $A_{xx} = 0.71$  mT,  $A_{yy} = 0.70$  mT,  $A_{zz} = 3.71$  mT.

Spin-Hamiltonian and dynamic parameters of TEMPO in PNIPA-1 inhomogeneities (type **B** particles) were determined from their individual EPR spectrum obtained via Cu<sup>2+</sup> ions addition and were used in simulation of total spectra without variations. In the case of TEMPO in PEG1-*b*-PNIPA and PEG2-*b*-PNIPA inhomogeneities (type **C** and type **D** particles, respectively), where suppression of type **A** particles (TEMPO in solution) signal by copper ions isn't applicable due to complexation with polymers functional groups, parameters of type **B** particles were used as an initial approximation and were varied in simulation. In addition to hyperfine splitting on the <sup>14</sup>N nuclei, the spectra contain satellite lines arising from hyperfine coupling with the six <sup>13</sup>C nuclei ( $I = \frac{1}{2}$ ) located close enough to the N-O group in the TEMPO molecule. To describe this feature, the <sup>13</sup>C nucleus with an increased abundance is six times and  $a_{iso} = 0.54$  mT was added to the simulation.

The ‘chili’ function in EasySpin utilizing the Schneider–Freed theory<sup>4,5</sup> for slowly tumbling nitroxides was used to simulate TEMPO spectra. The anisotropic values of the spin Hamiltonian parameters (the **g**-tensor and **A**-tensor) were averaged to obtain the  $g_{iso}$  and  $a_{iso}$  values. The

rotational correlation time ( $t_{corr}$ ) was calculated from the averaged rotational diffusion constant as described in ref. <sup>5</sup>:

$$g_{iso} = \frac{1}{3}(g_x + g_y + g_z); a_{iso} = \frac{1}{3}(A_{xx} + A_{yy} + A_{zz}); t_{corr} = \frac{1}{6\sqrt{D_{xx}D_{yy}D_{zz}}}$$

In the case of the spectra containing two types of the particles (probe in bulk solution (type **A**) and inside polymer inhomogeneities (types **B/C/D**, denoted in the formula as type **X**) fraction of the latter probes type was calculated from weight values of type **X** particles in the full EPR spectra, considering that the weight of type **A** particles is equal to 1:

$$x(X) = \frac{w(X)}{1 + w(X)}$$

The uncertainties for the simulated parameters were estimated as follows:

$$g_{iso} \pm 0.00003; a_{iso} \pm 0.01 mT; x \pm 1\%; t_{corr} \pm 0.1 ns$$

Table S1 shows the parameters of all particles encountered in this work. Parameters of type **E** particles, belonging to PNIPA-2 polymer, are presented for comparison. All parameters are taken at T = 60 °C.

| Table S1. Magnetic and dynamic parameters of particles used in present work, T = 60 °C. |                      |                |            |            |            |                |         |
|-----------------------------------------------------------------------------------------|----------------------|----------------|------------|------------|------------|----------------|---------|
| Particle Type                                                                           | Environment          | $a_{iso}$ , mT | $t_x$ , ns | $t_y$ , ns | $t_z$ , ns | $t_{iso}$ , ns | $x$ , % |
| <b>A</b>                                                                                | Bulk solution        | 1.73           | 0.01       | 0.01       | 0.01       | 0.01           | -       |
| <b>B</b>                                                                                | PNIPA-1              | 1.62           | 24.0       | 0.5        | 1.7        | 2.7            | 35      |
| <b>C</b>                                                                                | PEG1-b-PNIPA         | 1.62           | 31.1       | 0.3        | 2.3        | 2.9            | 41      |
| <b>D</b>                                                                                | PEG2-b-PNIPA         | 1.62           | 30.2       | 0.5        | 1.9        | 3.3            | 56      |
| <b>E</b>                                                                                | PNIPA-2 <sup>6</sup> | 1.60           | 17.8       | 0.3        | 1.8        | 2.1            | 63      |

## References

- 1 A. I. Kokorin, *Nitroxides - Theory, Experiment and Applications*, InTech, 2012.
- 2 S. Stoll and A. Schweiger, EasySpin, a comprehensive software package for spectral simulation and analysis in EPR, *Journal of Magnetic Resonance*, 2006, 178, 42–55.
- 3 S. Stoll, in *Multifrequency Electron Paramagnetic Resonance*, Wiley, 2014, pp. 69–138.
- 4 D. J. Schneider and J. H. Freed, 1989, pp. 1–76.
- 5 D. E. Budil, S. Lee, S. Saxena and J. H. Freed, Nonlinear-Least-Squares Analysis of Slow-Motion EPR Spectra in One and Two Dimensions Using a Modified Levenberg–Marquardt Algorithm, *J Magn Reson A*, 1996, 120, 155–189.

- 6 E. M. Zubanova, S. V. Kostjuk, P. S. Timashev, Y. A. Rochev, A. I. Kokorin, M. Ya. Melnikov and E. N. Golubeva, Inhomogeneities in PNIPAM Aqueous Solutions: The Inside View by Spin Probe EPR Spectroscopy, *Polymers (Basel)*, 2021, 13, 3829.
